# Supplementary material
Source: ML conference proceedings conference paper supplement (https://openaccess.thecvf.com/content/CVPR2022/html/Yang_ST_Make_Self-Training_CVPR_2022_paper.html)
Supplement: Supplementary file 1 [file Yang_ST_Make_Self-Training_CVPR_2022_supplemental.pdf]

# ST++: Make Self-training Work Better for Semi-supervised Semantic Segmentation

Lihe Yang<sup>1</sup> Wei Zhuo<sup>3</sup> Lei Qi<sup>4,1</sup> Yinghuan Shi<sup>1,2</sup> Yang Gao<sup>1</sup>

<sup>1</sup>State Key Laboratory for Novel Software Technology, Nanjing University

<sup>2</sup>National Institute of Healthcare Data Science, Nanjing University

<sup>3</sup>Tencent

<sup>4</sup>Southeast University

## 1. Qualitative Results on the Pascal VOC 2012 and Cityscapes

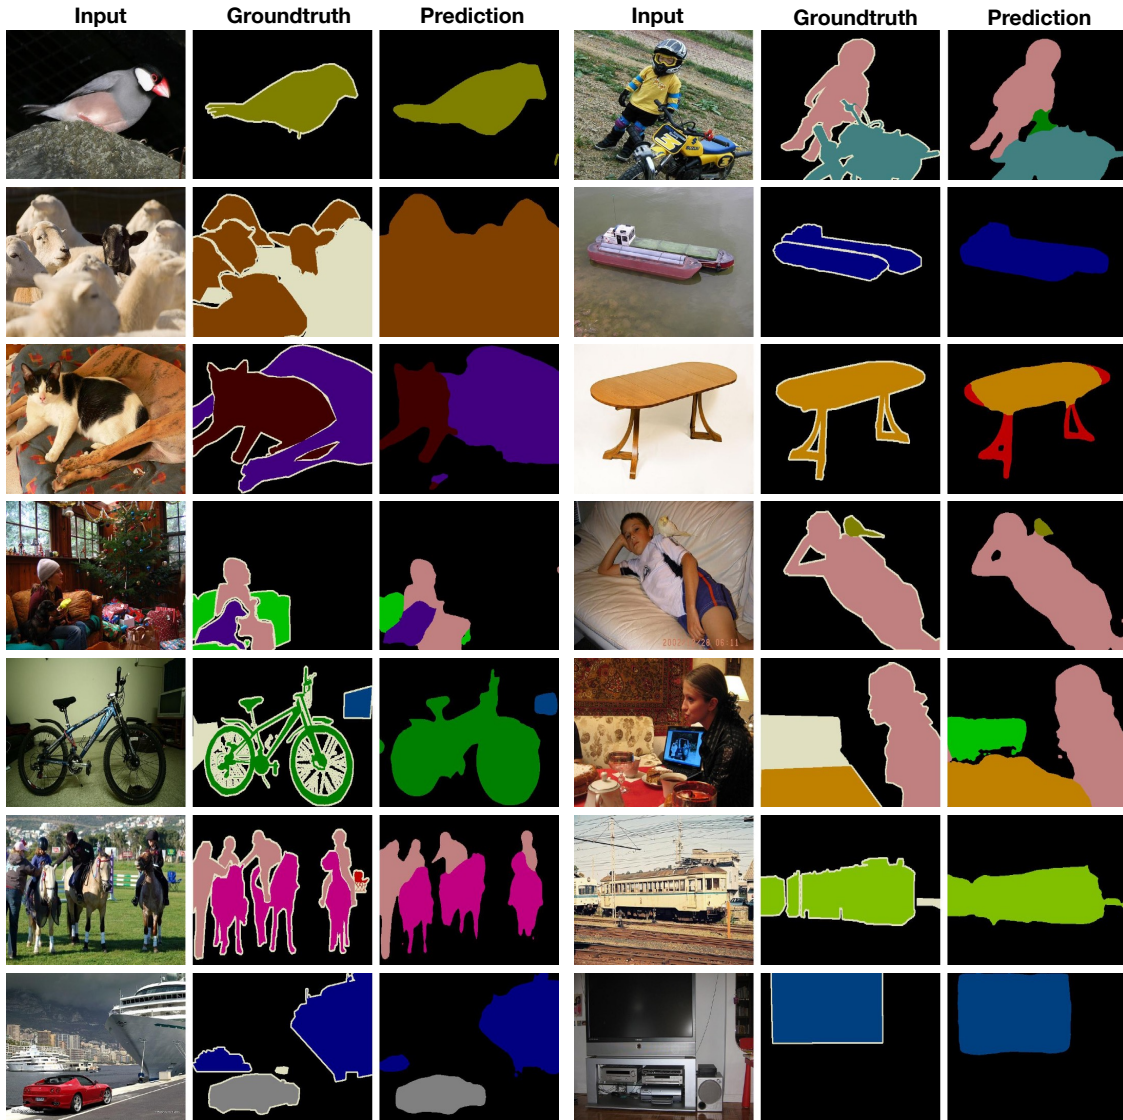

Figure 1. Qualitative results of our ST++ method on the validation set of Pascal VOC 2012 with 1/8 (1323) labeled images.

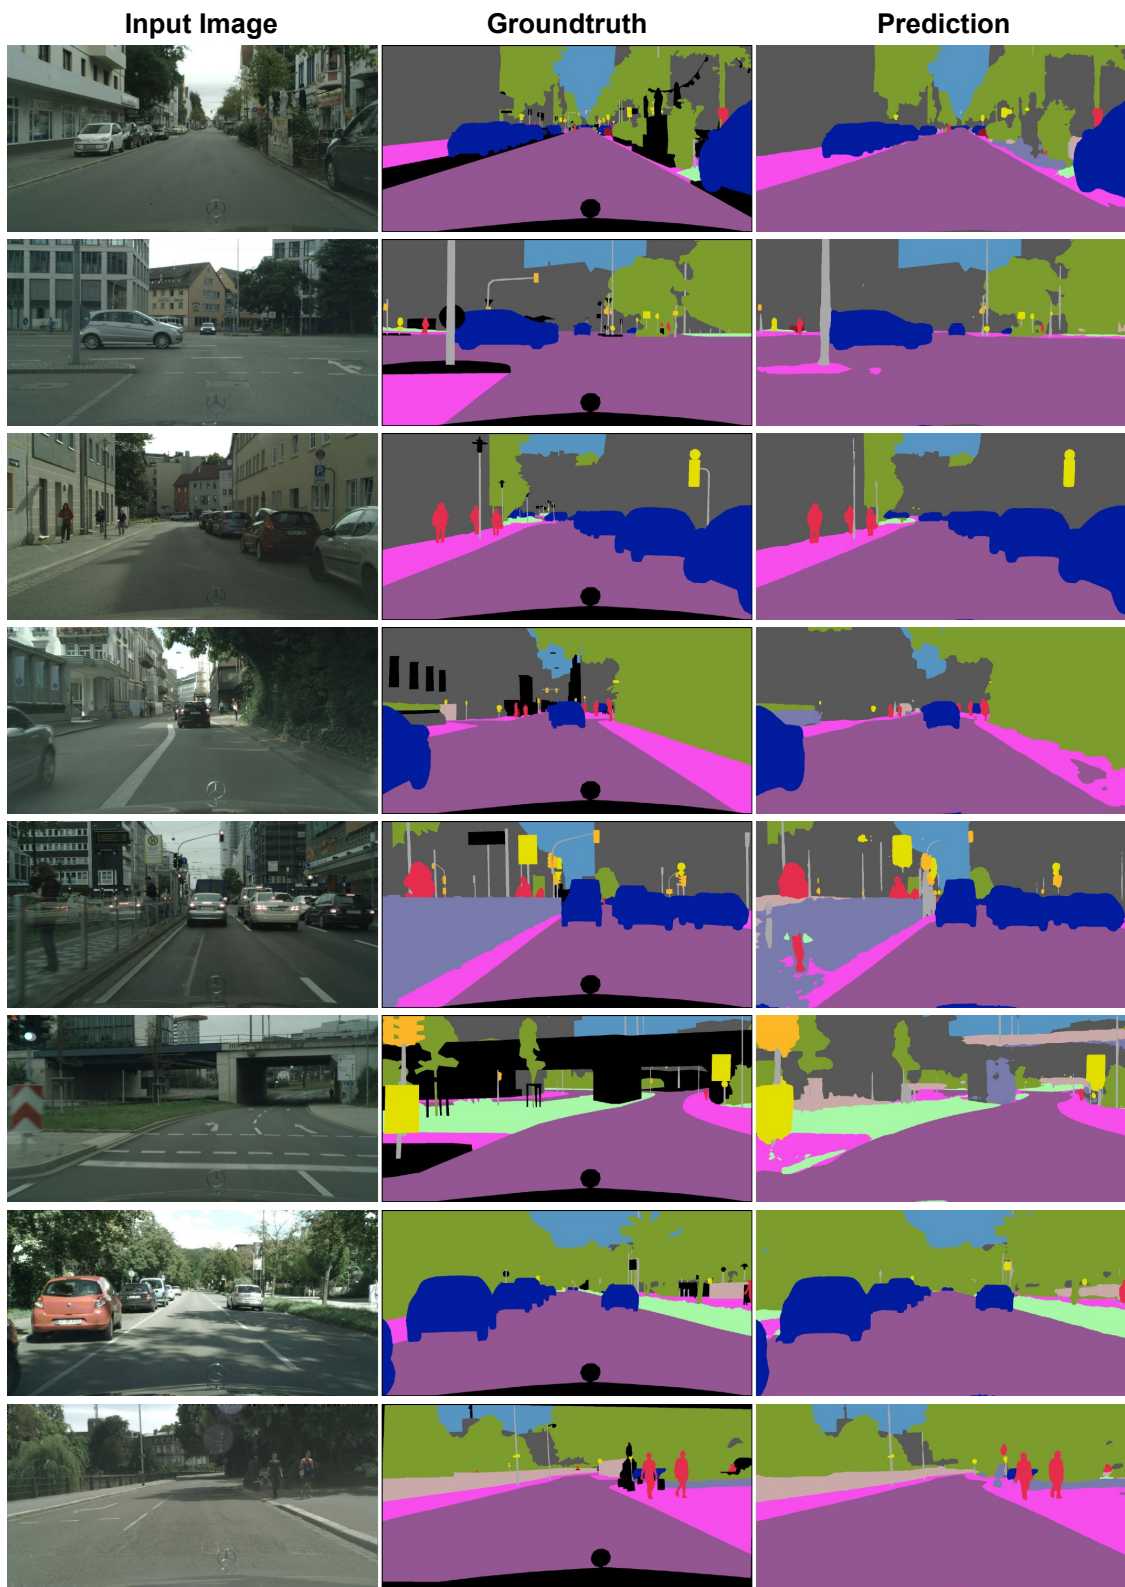

Figure 2. Qualitative results of our ST++ method on the validation set of Cityscapes with 1/8 (372) labeled images.
